## ANNOUNCEMENTS

### **Scientific Symposium on Perioperative Pain Mechanisms**

The second Scientific Symposium sponsored by the Editorial Board of ANESTHESIOLOGY will be held at the ASA meeting in Washington, D.C., on October 12, 1993. The symposium's theme is BASIC AND CLINICAL ASPECTS OF PERIOPERATIVE PAIN.

At 9 am, the symposium will start with 1 hour to view posters representing 13 selected abstracts. From 10 to 11 am, there will be two formal lectures: "Basic Mechanisms: An Overview," presented by Tony L. Yaksh, Ph.D., University of California, San Diego, and "Clinical Considerations: Insights and Possibilities," presented by Igor Kissin, M.D., Ph.D., Brigham and Women's Hospital, Harvard Medical School. The next 90 minutes will be devoted to a discussion of the posters and lectures, moderated by Charles Berde, M.D., Ph.D., Children's Hospital, Boston, Harvard Medical School.

Active audience participation is encouraged in this symposium. The Editorial Board seeks to advance the scientific content of the annual meeting and to establish a forum for discussing the relevance of basic research to clinical realities. We look forward to the attendance and participation of all interested.

### **ABA Examination for Certification of Continued Demonstration of Qualifications**

The American Board of Anesthesiology (ABA) will administer its written examination for certification of CONTINUED DEMONSTRATION OF QUALIFICATIONS on Saturday, May 14, 1994. Diplomates of the ABA who are interested in participating in the *voluntary* CDQ program may request an application by writing to the Secretary, American Board of Anesthesiology, 100 Constitution Plaza, Hartford, Connecticut 06103-1796. The deadline for receipt of completed applications in the Board office is November 15, 1993.
